# Supplementary material for: Laser ignition assisted spark-induced breakdown spectroscopy for the ultra-sensitive detection of trace mercury ions in aqueous solutions
Source: Royal Society of Chemistry journal article supplement (doi:10.1039/c0ja00062k), 2010-01-01
Supplement: c0ja00062k.pdf [file c0ja00062k.pdf]

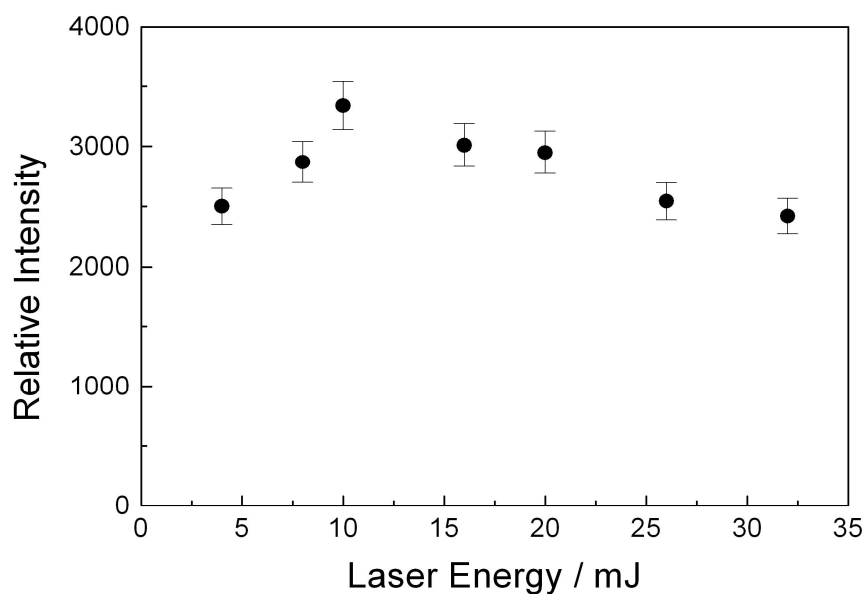

Figure S-1. Effect of laser pulse energy on the atomic emission intensity of mercury at 253.65nm in LI-SIBS. High voltage of discharge: 4kV; Discharge current: 20A, time-delay of laser and HV pulse: 10 $\mu$ s. Discharge current was measured with a current sensor. Error bars show standard deviation of three times measurements for each point.

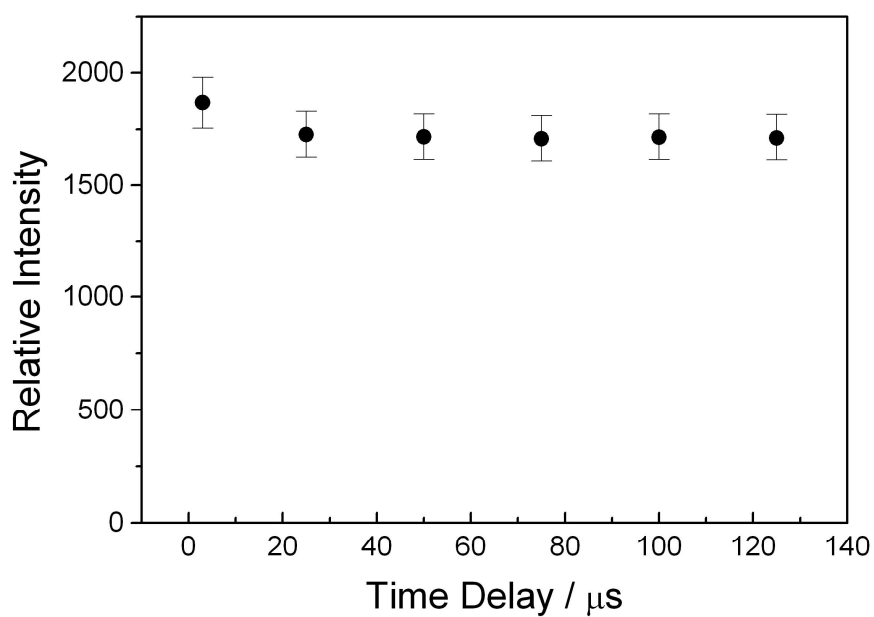

Figure S-2. Effect of time-delay between laser pulse and HV pulse on the atomic emission intensity of mercury at 253.65nm in LI-SIBS. High voltage of discharge: 4kV; Discharge current: 20A, laser pulse energy: 10mJ. Error bars show standard deviation of three times measurements for each point.

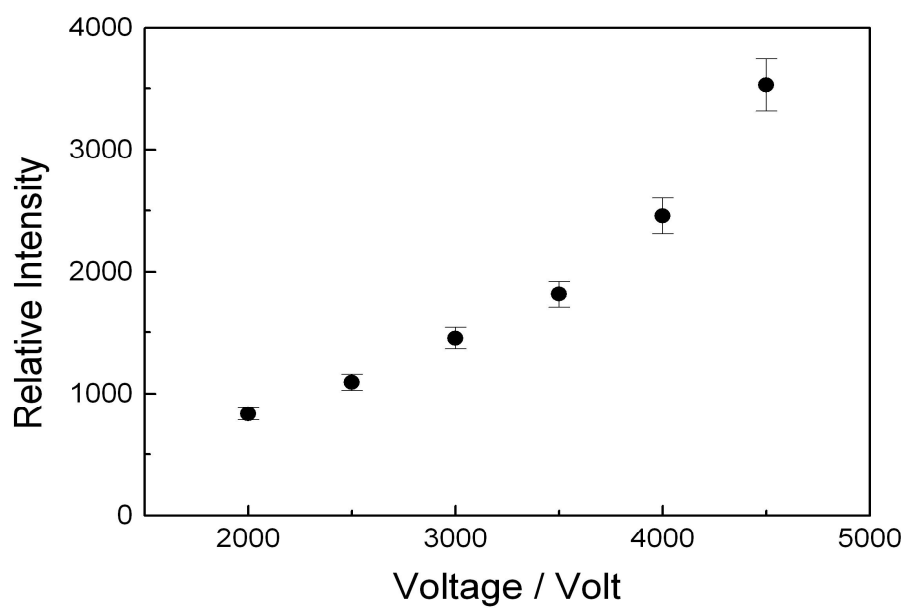

Figure S-3. Effect of discharge voltage on the atomic emission intensity of mercury at 253.65nm in LI-SIBS. Time-delay of laser and HV pulse: 10 $\mu$ s; laser pulse energy: 10mJ; resistor load in discharge loop: 200 $\Omega$ . Error bars show standard deviation of three times measurements for each point.

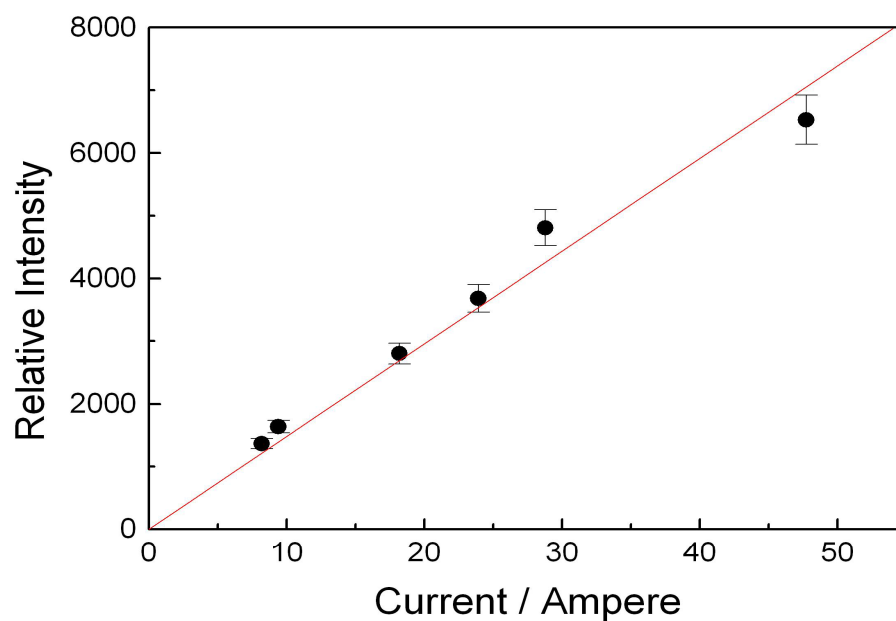

Figure S-4. Effect of discharge current on the atomic emission intensity of mercury at 253.65nm in LI-SIBS. High voltage of discharge: 4kV; Time-delay of laser and HV pulse: 10 $\mu$ s; laser pulse energy: 10mJ. Discharge current was varied by adding different resistor load in the discharge loop and was measured with a current sensor. Error bars show standard deviation of three times measurements for each point.
